# Supplementary material for: Latent class analysis of the social determinants of health-seeking behaviour for delivery among pregnant women in Malawi
Source: PubMed Central journal article supplement (PMC6441245; doi:10.1136/bmjgh-2018-000930), 2019-03-30
Supplement: bmjgh-2018-000930supp001.pdf [file bmjgh-2018-000930supp001.pdf]

| <b>Appendix, Table 1. Data dictionary</b>                                                                                                                |                      |                                         |                      |                                              |
|----------------------------------------------------------------------------------------------------------------------------------------------------------|----------------------|-----------------------------------------|----------------------|----------------------------------------------|
| <b>Survey question*</b>                                                                                                                                  | <b>Variable name</b> | <b>Variable definition</b>              | <b>Variable type</b> | <b>Categories</b>                            |
| Household Information Panel: Cluster number<br>MES HH1 (p. 541)                                                                                          | hh1                  | Enumeration area code/cluster number    | Continuous           |                                              |
| Household Information Panel: Cluster number → household number → Woman's Information Panel: Woman's line number<br>MES HH1: HH2: WM4<br>(p. 541 and 564) | w_id                 | Unique woman identification number      | Continuous           |                                              |
| <i>Calculated by survey administrators post-hoc</i>                                                                                                      | w_weight             | Woman's sampling weight                 | Continuous           |                                              |
| Household Information Panel: Urban or Rural<br>MES HH6 (p. 541)                                                                                          | urban                | Urban residence                         | Binary               |                                              |
| Soap: When you have soap in the house, what do you use it for? Washing hands<br>MES SD1 (p. 600)                                                         | hh_usesoaphw         | Woman reports soap used for handwashing | Binary               |                                              |
| <i>Calculated by survey administrators post-hoc</i>                                                                                                      | hh_windex5           | Wealth quintile                         | Categorical          | Poorest<br>Poor<br>Middle<br>Rich<br>Richest |
| Woman's background: In what month and year were you born?                                                                                                | w_agebirth           | Woman's age (years) at birth of child   | Continuous           |                                              |

|                                                                                                                                                        |             |                                |             |                                                                                                                     |
|--------------------------------------------------------------------------------------------------------------------------------------------------------|-------------|--------------------------------|-------------|---------------------------------------------------------------------------------------------------------------------|
| <p>→ How old are you?<br/> Birth History:<br/> In what month and year was (<i>child's name</i>) born?<br/> MES WB1, WB2, BH4<br/> (p. 566, 569-70)</p> |             |                                |             |                                                                                                                     |
| <p>Woman's background:<br/> In what month and year were you born?<br/> → How old are you?<br/> MES WB1, WB2<br/> (p. 566)</p>                          | w_age       | Woman's age (years) today      | Continuous  |                                                                                                                     |
| <p>Household Characteristics:<br/> To what ethnic group does the head of this household belong?<br/> MES HC1C (p. 551)</p>                             | w_ethnicity | Ethnicity of head of household | Categorical | Chewa<br>Tumbuka<br>Lomwe<br>Tonga<br>Yao<br>Sena<br>Nkhonde<br>Ngoni<br>Other                                      |
| <p>Household Characteristics:<br/> What is the religion of the head of this household?<br/> MES HC1A (p. 551)</p>                                      | w_religion  | Religion of head of household  | Categorical | Catholic<br>CCAP<br>Anglican<br>Seventh Day Adventist<br>Other Christian<br>Muslim<br>No religion<br>Other religion |
| <p>Woman's Background: Have you ever attended school?<br/> What is the highest</p>                                                                     | w_elevel    | Woman's education level        | Categorical | None (includes preschool)<br>Primary<br>Secondary<br>Higher                                                         |

|                                                                                                                                            |             |                                                 |             |                                                                                             |
|--------------------------------------------------------------------------------------------------------------------------------------------|-------------|-------------------------------------------------|-------------|---------------------------------------------------------------------------------------------|
| level of school you attended?<br>MES WB3, WB4 (p. 566)                                                                                     |             |                                                 |             |                                                                                             |
| <i>Calculated from education level</i>                                                                                                     | w_edsec     | Woman: secondary education or above             | Binary      |                                                                                             |
| Woman's Background: Now I would like you to read this sentence (show sentence on card to respondent) to me.<br>MES WB5, WB7 (p. 566)       | w_literacy  | Woman: result of literacy test                  | Categorical | Can read (Includes "Able to read whole sentence" and "Able to read only parts of sentence") |
|                                                                                                                                            |             |                                                 |             | Cannot read                                                                                 |
|                                                                                                                                            |             |                                                 |             | Blind/visually impaired                                                                     |
| Marriage/Union: Are you currently married or living together with a man as if married?<br>MES MA1 (p. 588)                                 | w_mstatus   | Woman's marital status                          | Categorical | Currently married (Includes "Yes, currently married", and "Yes, living with a man")         |
|                                                                                                                                            |             |                                                 |             | Not currently married                                                                       |
| Marriage/Union: How old is your husband/partner?<br>MES MA2 (p. 588)                                                                       | partner_age | Spouse or partner age (years)                   | Continuous  |                                                                                             |
| Fertility/Birth History: Sum of number of live births<br>MES CM10 (p. 568)                                                                 | w_ceb       | Total children born                             | Continuous  |                                                                                             |
| Maternal and Newborn Health: Did you see anyone for antenatal care during your pregnancy with ( <i>child's name</i> )?<br>MES MN1 (p. 573) | anc_any     | Any antenatal care visit during this pregnancy  | Binary      |                                                                                             |
| <i>Calculated from:</i>                                                                                                                    | anc_4visit  | ≥ 4 antenatal care visits during this pregnancy | Binary      |                                                                                             |

|                                                                                                                                                                                                                                                                                                                                                                 |              |                                           |             |                |
|-----------------------------------------------------------------------------------------------------------------------------------------------------------------------------------------------------------------------------------------------------------------------------------------------------------------------------------------------------------------|--------------|-------------------------------------------|-------------|----------------|
| Maternal and Newborn Health:<br>How many times did you receive antenatal care during this pregnancy?<br>MES MN3 (p. 573)                                                                                                                                                                                                                                        |              |                                           |             |                |
| Maternal and Newborn Health:<br>For women who delivered by caesarean section: When was the decision made to have the caesarean section? Was it before or after your labour pains started?<br>MES MN19, MN19A (p. 576)                                                                                                                                           | del_cspretet | Cesarean delivery decided on before labor | Binary      |                |
| <p><i>Calculated from 5 items in MES for woman's last pregnancy.</i></p> <p>Number of risk factors that each woman reported. Risk factors included maternal age &lt;19, incomplete antenatal care (&lt;4 visits), primiparity, giving birth to multiples (e.g., twins), and giving birth to a very small neonate (&lt;2500g, or a neonate described as very</p> | del_risk     | Delivery risk score                       | Categorical | 0 risk factors |
|                                                                                                                                                                                                                                                                                                                                                                 |              |                                           |             | 1 risk factor  |
|                                                                                                                                                                                                                                                                                                                                                                 |              |                                           |             | 2 risk factors |
|                                                                                                                                                                                                                                                                                                                                                                 |              |                                           |             | 3 risk factors |
|                                                                                                                                                                                                                                                                                                                                                                 |              |                                           |             | 4 risk factors |
| 5 risk factors                                                                                                                                                                                                                                                                                                                                                  |              |                                           |             |                |

|                                                                                                                                                           |                |                                                         |            |  |
|-----------------------------------------------------------------------------------------------------------------------------------------------------------|----------------|---------------------------------------------------------|------------|--|
| small if no birthweight data.)                                                                                                                            |                |                                                         |            |  |
| Birth History:<br>In what month and year was ( <i>child's name</i> ) born?<br>MES BH4 (p. 569-70)                                                         | inf_dob        | Child date of birth                                     | Continuous |  |
| <i>Calculated from infant date of birth, with rainy season from November through April</i>                                                                | rainy          | Child date of birth during rainy season                 | Binary     |  |
| Birth History:<br>Were any of these births twins?<br>MES BH2 (p. 569-70)                                                                                  | inf_multiple   | More than one child birthed during delivery             | Binary     |  |
| Birth History:<br>Line number<br>MES BH LN (p. 569-70)                                                                                                    | inf_primip     | Primiparous                                             | Binary     |  |
| Desire for Last Birth:<br>When you got pregnant with ( <i>child's name</i> ), did you want to get pregnant at that time?<br>MES DB1 (p. 572)              | inf_unintended | Woman's pregnancy was not wanted at all or at that time | Binary     |  |
| Desire for Last Birth:<br>If pregnancy was unintended: Did you want to have a baby later on, or did you not want any (more) children?<br>MES DB3 (p. 572) | inf_mistimed   | Woman's pregnancy earlier than desired                  | Binary     |  |
| Desire for Last Birth:                                                                                                                                    | inf_unwanted   | Woman's pregnancy unwanted                              | Binary     |  |

|                                                                                                                                                     |               |                                                                 |             |                    |
|-----------------------------------------------------------------------------------------------------------------------------------------------------|---------------|-----------------------------------------------------------------|-------------|--------------------|
| If pregnancy was unintended: Did you want to have a baby later on, or did you not want any (more) children?<br>MES DB2 (p. 572)                     |               |                                                                 |             |                    |
| Birth History:<br>Is ( <i>child's name</i> ) still alive?<br>MES BH5 (p. 569-70)                                                                    | w_csurv       | Number of surviving children out of total children ever birthed | Continuous  |                    |
| Maternal and Newborn Health:<br>Where did you give birth to ( <i>child's name</i> )? Choices for facility types were provided.<br>MES MN18 (p. 575) | MES_factype   | MICS facility type where woman delivered                        | Categorical | Non-facility       |
|                                                                                                                                                     |               |                                                                 |             | Public             |
|                                                                                                                                                     |               |                                                                 |             | Private            |
|                                                                                                                                                     |               |                                                                 |             | Mission            |
|                                                                                                                                                     |               |                                                                 |             | Other              |
| Facility Identification:<br>Type of facility (country-specific)<br>SPA 006<br>Appendix C (p. 186)                                                   | spa_factype   | SPA facility type                                               | Categorical | Central hospital   |
|                                                                                                                                                     |               |                                                                 |             | District hospital  |
|                                                                                                                                                     |               |                                                                 |             | Community hospital |
|                                                                                                                                                     |               |                                                                 |             | Other hospital     |
|                                                                                                                                                     |               |                                                                 |             | Health center      |
|                                                                                                                                                     |               |                                                                 |             | Maternity          |
|                                                                                                                                                     |               |                                                                 |             | Dispensary         |
|                                                                                                                                                     |               |                                                                 |             | Clinic             |
| Health post                                                                                                                                         |               |                                                                 |             |                    |
| Facility Identification:<br>Managing authority (ownership)<br>SPA 007<br>Appendix C (p. 186)                                                        | fac_mga       | SPA facility management type                                    | Categorical | Government         |
|                                                                                                                                                     |               |                                                                 |             | Private            |
|                                                                                                                                                     |               |                                                                 |             | CHAM               |
| User Fees:<br>Does this facility have a fee for the following                                                                                       | fees_delivery | Delivery fees charged in facility                               | Binary      |                    |

|                                                                 |                |                                         |            |  |
|-----------------------------------------------------------------|----------------|-----------------------------------------|------------|--|
| items: Normal deliveries<br>SPA 362_07<br>Appendix C (p. 194)   |                |                                         |            |  |
| <i>Composite calculated from 19 items on SPA facility audit</i> | ssr_bobs_score | Service readiness: basic obstetric care | Continuous |  |
| <i>Calculated during analysis, see Methods</i>                  | dist_km        | Distance (kilometers) to facility       | Continuous |  |

\*Survey questions are taken from the Malawi MDG Endline Survey<sup>18</sup> or the Malawi Service Provision Assessment (SPA)<sup>19</sup>, and exact survey question numbers and pages within those instruments are noted.

Appendix, Figure 1. Graph of Bayesian information criterion showing optimal number of classes for formula selection.

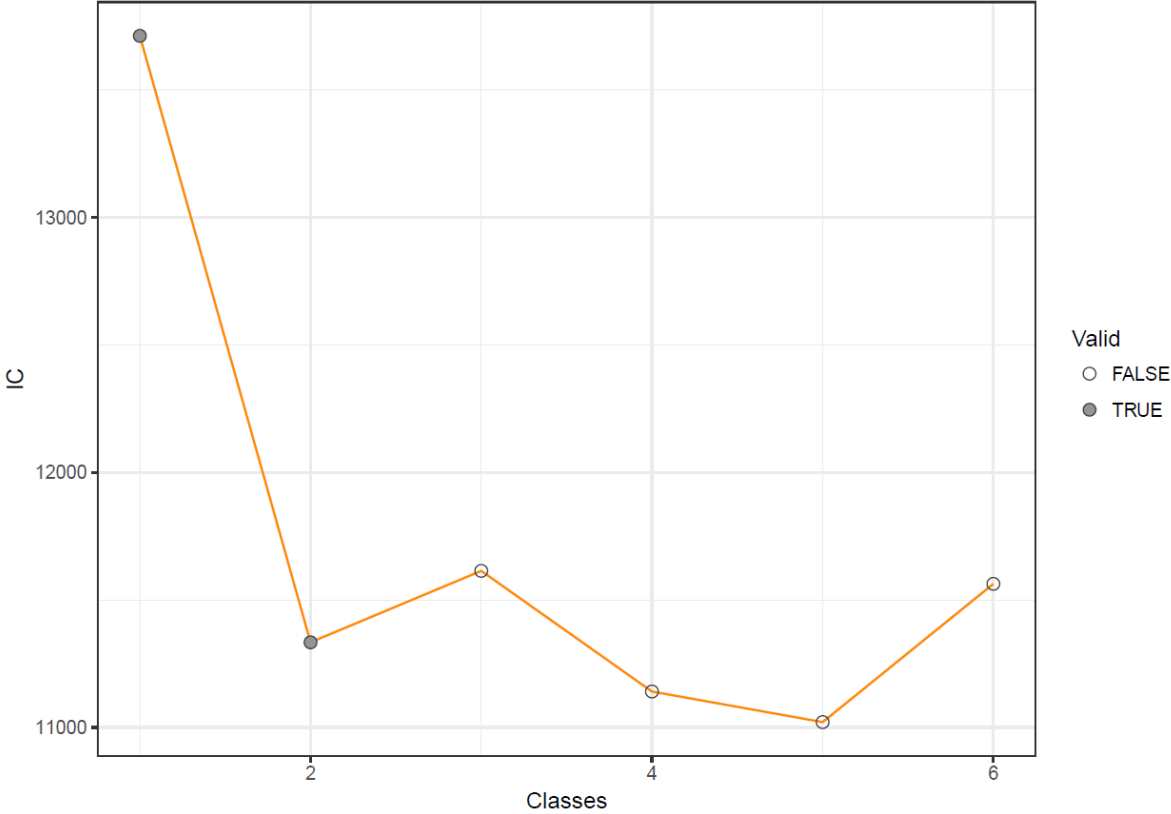

Validity was marked as FALSE when the formula was collinear, or computationally singular.



**Appendix, Table 2. Comparison of coefficients to evaluate random effects**

| Alternative                                                            | Coefficient                             |                                     |                                                   |
|------------------------------------------------------------------------|-----------------------------------------|-------------------------------------|---------------------------------------------------|
|                                                                        | Uncorrelated<br>(Latent Class<br>Model) | Correlated<br>(Multilevel<br>Model) | Uncorrelated<br>(Latent Class)<br><i>p</i> -value |
| <b>Class 1 facility-level preferences</b>                              |                                         |                                     |                                                   |
| Facility type                                                          |                                         |                                     |                                                   |
| Central Hospital                                                       | Reference                               |                                     |                                                   |
| District hospital                                                      | 14.492                                  | -0.507                              | 0.895                                             |
| Community hospital                                                     | 7.062                                   | -321.908                            | 0.949                                             |
| Other hospital type                                                    | 14.866                                  | -87.238                             | 0.893                                             |
| Clinic                                                                 | 6.353                                   | -249.587                            | 0.954                                             |
| Health center                                                          | 15.045                                  | -0.879                              | 0.891                                             |
| Maternity                                                              | 13.779                                  | -39.396                             | 0.900                                             |
| Distance to facility (km)                                              | -6.050                                  | -131.550                            | 2.20E-16                                          |
| Basic obstetric readiness (scale 0-1)                                  | -0.434                                  | -12.066                             | 0.111                                             |
| Fees (reference = no fees)                                             | -5.735                                  | -169.974                            | 2.20E-16                                          |
| <b>Class 2 facility-level preferences</b>                              |                                         |                                     |                                                   |
| Facility type                                                          |                                         |                                     |                                                   |
| Central Hospital                                                       | Reference                               |                                     |                                                   |
| District hospital                                                      | -1.054                                  | 6.592                               | 7.82E-05                                          |
| Community hospital                                                     | -2.242                                  | -0.723                              | 2.20E-16                                          |
| Other hospital type                                                    | -2.393                                  | -0.865                              | 2.20E-16                                          |
| Clinic                                                                 | -2.862                                  | -1.467                              | 2.20E-16                                          |
| Health center                                                          | -4.629                                  | -3.324                              | 2.20E-16                                          |
| Maternity                                                              | -21.938                                 | -150.845                            | 0.996                                             |
| Distance to facility (km)                                              | 0.834                                   | 0.181                               | 2.20E-16                                          |
| Basic obstetric readiness (scale 0-1)                                  | 1.441                                   | 3.173                               | 9.14E-07                                          |
| Fees (reference = no fees)                                             | -0.105                                  | -1.090                              | 0.330                                             |
| <b>Individual-level characteristics of Class 2 compared to Class 1</b> |                                         |                                     |                                                   |
| Wealth                                                                 |                                         |                                     |                                                   |
| Poorest                                                                | Reference                               |                                     |                                                   |
| Poor                                                                   | -0.072                                  | -0.209                              | 0.479                                             |
| Middle                                                                 | -0.004                                  | -0.066                              | 0.969                                             |
| Rich                                                                   | 0.099                                   | -0.150                              | 0.362                                             |
| Richest                                                                | 0.316                                   | 0.403                               | 0.018                                             |
| Urban/Rural                                                            |                                         |                                     |                                                   |
| Rural                                                                  | Reference                               |                                     |                                                   |
| Urban                                                                  | -0.006                                  | -0.792                              | 0.963                                             |
| Woman's age                                                            | 0.140                                   | 0.125                               | 0.036                                             |
| Spouse or partner age                                                  | -0.091                                  | -0.080                              | 0.148                                             |
| Education                                                              |                                         |                                     |                                                   |

|                                                   |           |        |          |
|---------------------------------------------------|-----------|--------|----------|
| Primary education or below (includes preschool)   | Reference |        |          |
| Secondary education or above                      | 0.487     | 0.519  | 3.50E-07 |
| Literacy                                          |           |        |          |
| Literate                                          | Reference |        |          |
| Illiterate                                        | -0.187    | -0.224 | 0.018    |
| Blind or visually impaired                        | 12.659    | 58.854 | 0.945    |
| Primiparous                                       | 0.294     | 0.342  | 0.095    |
| Multiple birth ( <i>e.g.</i> , twins)             | 1.010     | 1.562  | 4.74E-05 |
| Woman's pregnancy unwanted                        | 0.356     | 0.308  | 0.002    |
| At least 4 antenatal care visits during pregnancy | 0.000     | 0.060  | 0.998    |
| Delivery risk score (scale 0-4)                   | -0.024    | -0.058 | 0.830    |
| Cesarean delivery planned before labor onset      | 2.431     | 3.658  | 3.29E-09 |
